# Supplementary material
Source: PubMed Central journal article supplement (PMC1617326)

## Supplementary Figures

### Supplementary Figure 1: Degree correlation for $HC^h$ and $HC^m$ networks

Degree correlations were computed as described [2].  $HC^h$  is a subset of HC network with only HTP based multivalidated interactions.  $HC^m$  is a subset of HC network with only those interactions that are assessed via two different methods.

#### a) $HC^h$

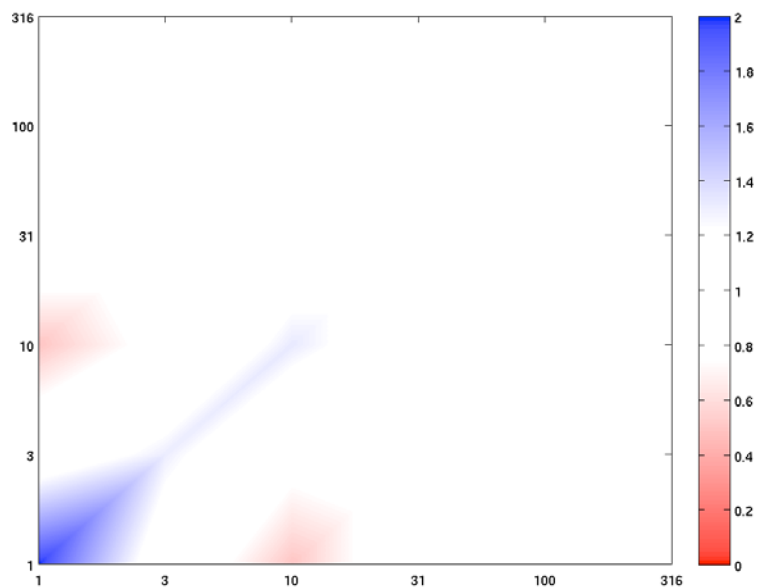

#### b) $HC^m$

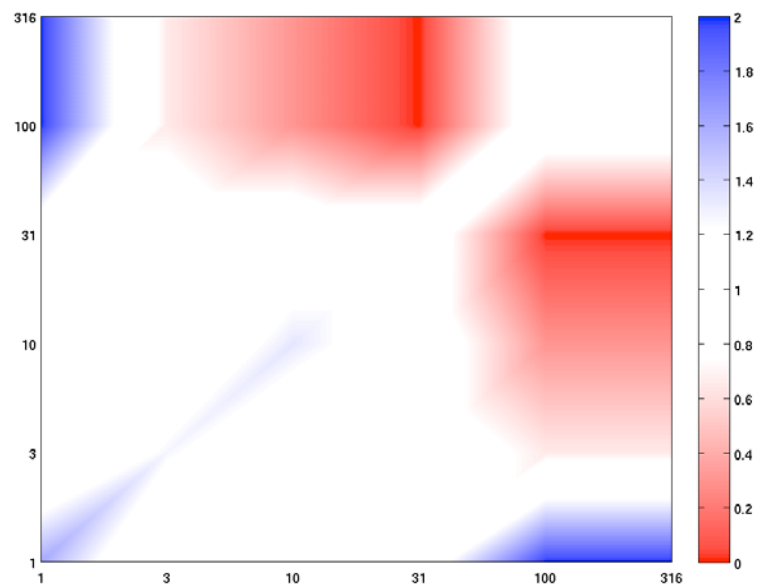

Supplement: pbio.0040317.sg001.pdf [file pbio.0040317.sg001.pdf]
