# Supplementary material
Source: PubMed Central journal article supplement (PMC1617326)

### Supplementary Figure 5: Degree correlation pattern for a reduced HC network that contains only non-essential proteins

Degree correlations were computed as described [2]. As the HC network is enriched in essentials relative to the HTP network, and essentials are more connected than non-essentials, the lack of degree anti-correlation shown in Figure 2 may result from enrichment of interactions among hubs in the HC dataset. We therefore regenerated the degree correlation figure for a reduced HC network in which only the interactions among non-essentials are retained. Anti-correlation was also not observed in this reduced network.

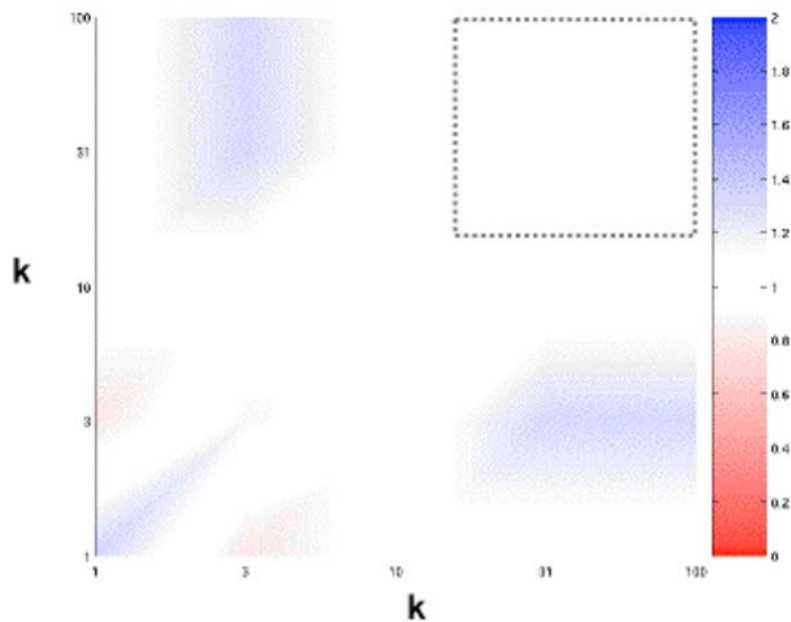

Supplement: pbio.0040317.sg005.pdf [file pbio.0040317.sg005.pdf]
